# Supplementary material for: T cell stimulation and expansion by SunTag-based clustering of anti-CD3/CD28 scFv
Source: publisher site journal article supplement (doi:10.18632/aging.103318), 2020-06-10
Supplement: Supplementary file [file aging-v12i11-103318-supplementary-material-SD1.pdf]

## SUPPLEMENTARY TABLE

**Supplementary Table 1. B7-H3 expression patterns in HNC and cervical cancer tissues analyzed with IHC.**

| Tumor Type      | Stained | Positive | Intensity |    |    |     |
|-----------------|---------|----------|-----------|----|----|-----|
|                 |         |          | -         | +  | ++ | +++ |
| HNC             | 62      | 65%      | 22        | 10 | 12 | 18  |
| Cervical cancer | 41      | 73%      | 12        | 5  | 8  | 16  |

Note: The staining intensity was scored using a common four-point scale as follows: no expression (-), <20% positive cells (+, low or weak expression), 20–50% positive cells (++, moderate expression), and >50% positive cells (+++, high or strong expression).

HNC: Head and neck cancer
